# Supplementary material for: Ultra-sensitive digital quantification of proteins and mRNA in single cells
Source: PubMed Central journal article supplement (PMC6685952; doi:10.1038/s41467-019-11531-z), 2019-08-07
Supplement: 41467_2019_11531_MOESM2_ESM.pdf [file 41467_2019_11531_MOESM2_ESM.pdf]

## Description of Additional Supplementary Files

**File name:** Supplementary Movie 1

**Description:** Time-lapse video showing p65-DsRed HEK293T are insensitive to high TNF- $\alpha$  stimulation, which supports the result of on-chip digital PLA measurement where TNF receptor (TNFR1) readings were all below limit of detection (LOD).

**File name:** Supplementary Movie 2

**Description:** Time-lapse video showing ICP4-YFP reporter signal in infected cells are stable once expressed.

**File name:** Supplementary Data 1

**Description:** Raw data of protein measurements in single cells.
